# Supplementary material for: Carboxyl-functionalized two-dimensional MXene–Au nanocomposites were prepared as SERS substrates for the detection of melamine in dairy products
Source: Royal Society of Chemistry journal article supplement (doi:10.1039/d4ra02249a), 2024-01-01
Supplement: d4ra02249a1.pdf [file d4ra02249a1.pdf]

## Supplementary Material

### Carboxyl-Modified Two-Dimensional MXene-Au as SERS

#### Substrate for Detecting Melamine

Dongbo Xi<sup>1,2</sup>, Ruipeng Chen<sup>2</sup>, Shuyue Ren<sup>2,\*</sup>, Zhenhong Jia<sup>1,\*</sup>, Zhixian Gao<sup>2,\*</sup>

1. School of Information Science and Engineering, Xinjiang University, Urumqi 830000, China

2. Tianjin Key Laboratory of Risk Assessment and Control Technology for Environment and Food Safety, Tianjin Institute of Environmental and Operational Medicine, Tianjin, 300050, China.

Corresponding Author:

\* S. Ren: e-mail, [renshuyue2018@163.com](mailto:renshuyue2018@163.com)

\* Zhenhong Jia: e-mail, [jzh@xju.edu.cn](mailto:jzh@xju.edu.cn)

\* Z. Gao: e-mail, [gaozhx@163.com](mailto:gaozhx@163.com);

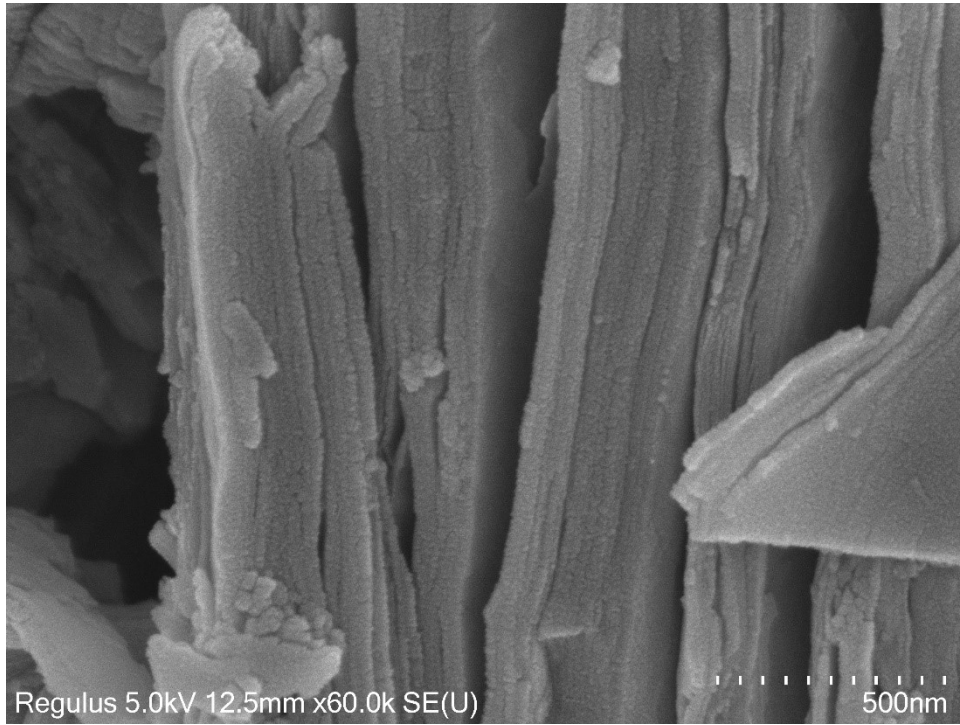

**Fig. S1.** SEM image of Ti<sub>2</sub>N

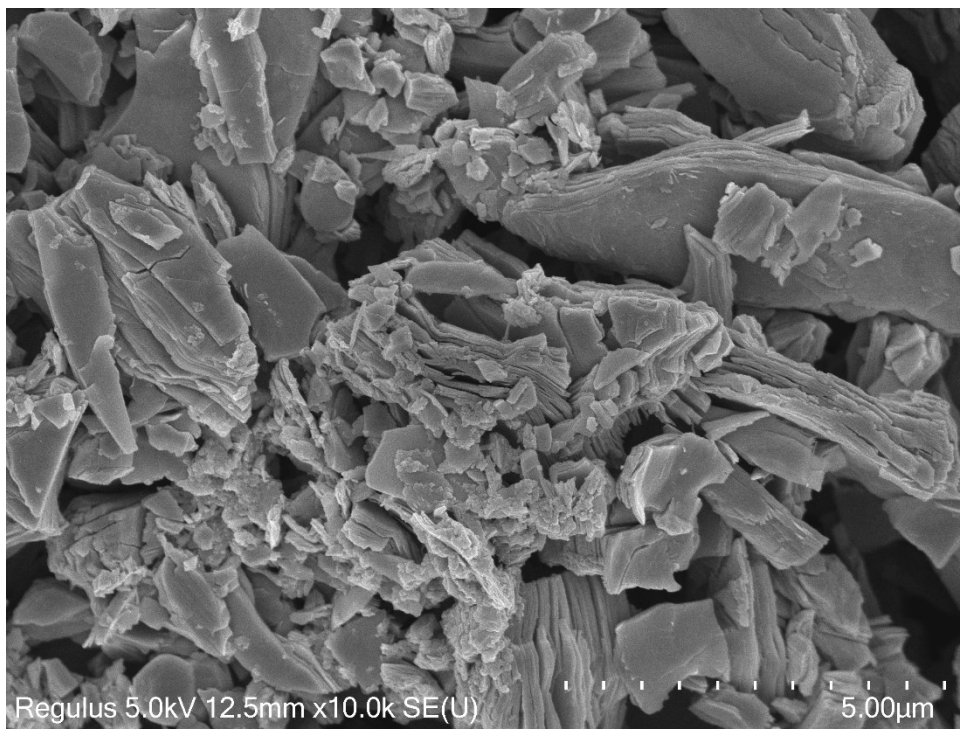

**Fig. S2.** SEM image of Ti<sub>2</sub>N

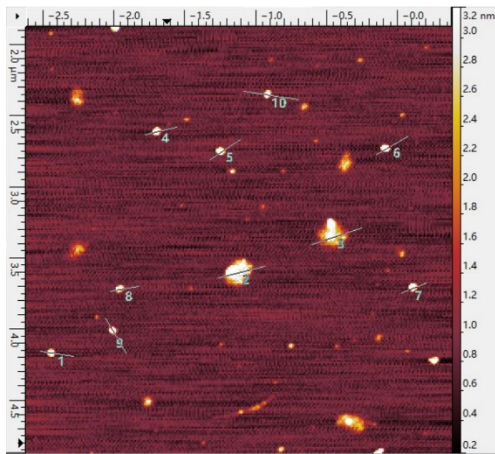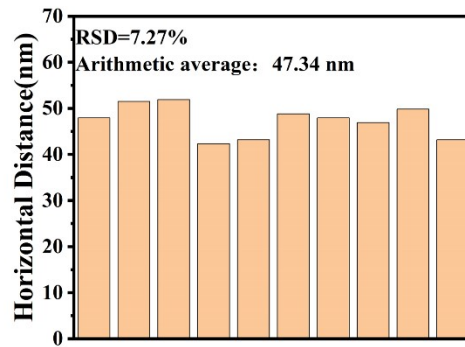

Fig. S3. AFM of Au-Ti<sub>2</sub>N-COOH

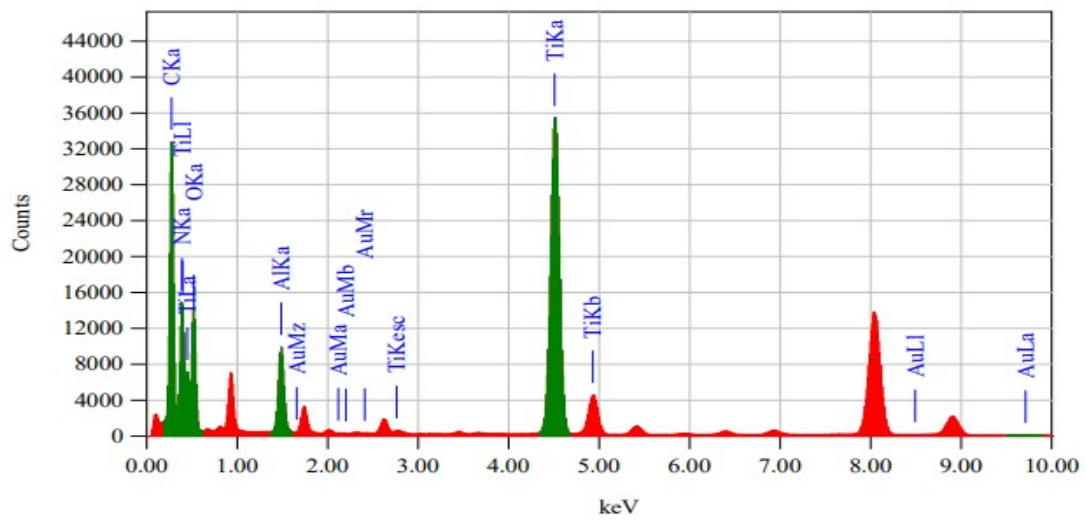

Fig. S4. Elemental content of Ti,Au,N,C,O and Al.

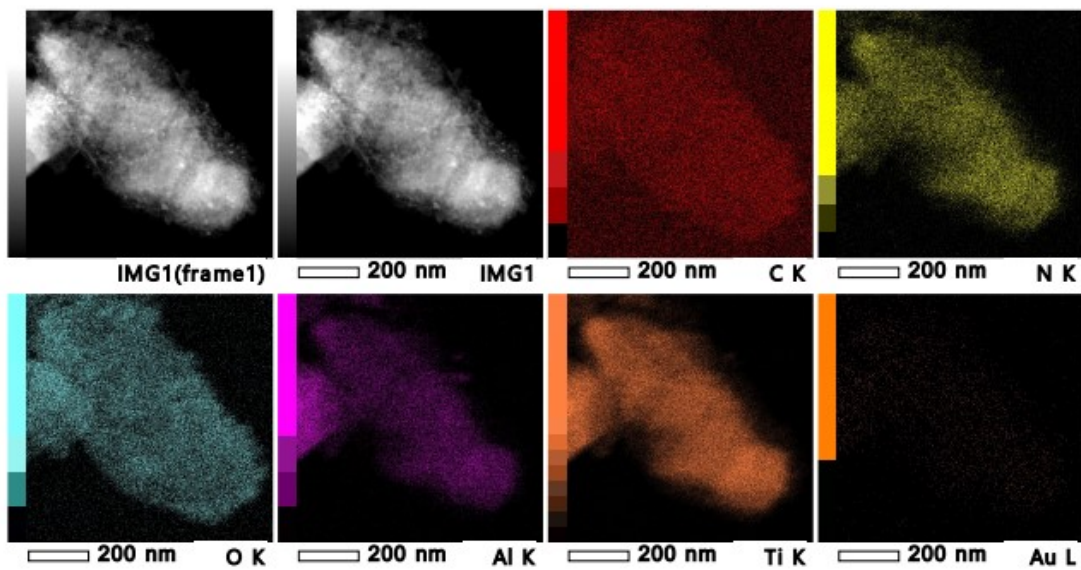

Fig. S5. Elemental mapping image of C,N,O, Ti, Au and their overlay distribution

Thin Film Standardless Standardless Quantitative Analysis  
Fitting Coefficient : 0.2774

| Element     | (keV) | Mass%  | Counts    | Sigma | Atom%  | Compound | Mass% | Cation | K      |
|-------------|-------|--------|-----------|-------|--------|----------|-------|--------|--------|
| C K         | 0.277 | 43.09  | 151941.03 | 0.11  | 64.73  |          |       |        | 3.1215 |
| N K         | 0.392 | 6.93   | 41566.59  | 0.05  | 8.93   |          |       |        | 1.8358 |
| O K         | 0.525 | 8.13   | 67625.50  | 0.05  | 9.17   |          |       |        | 1.3230 |
| Al K        | 1.486 | 4.83   | 68869.06  | 0.04  | 3.23   |          |       |        | 0.7715 |
| Ti K (Ref.) | 4.508 | 37.00  | 407173.63 | 0.12  | 13.94  |          |       |        | 1.0000 |
| Au L*       | 9.712 | 0.02   | 63.77     | 0.01  | 0.00   |          |       |        | 3.7301 |
| Total       |       | 100.00 |           |       | 100.00 |          |       |        |        |

**Table. S1.** The proportion of Ti,Au,Al,O,C and N elements.

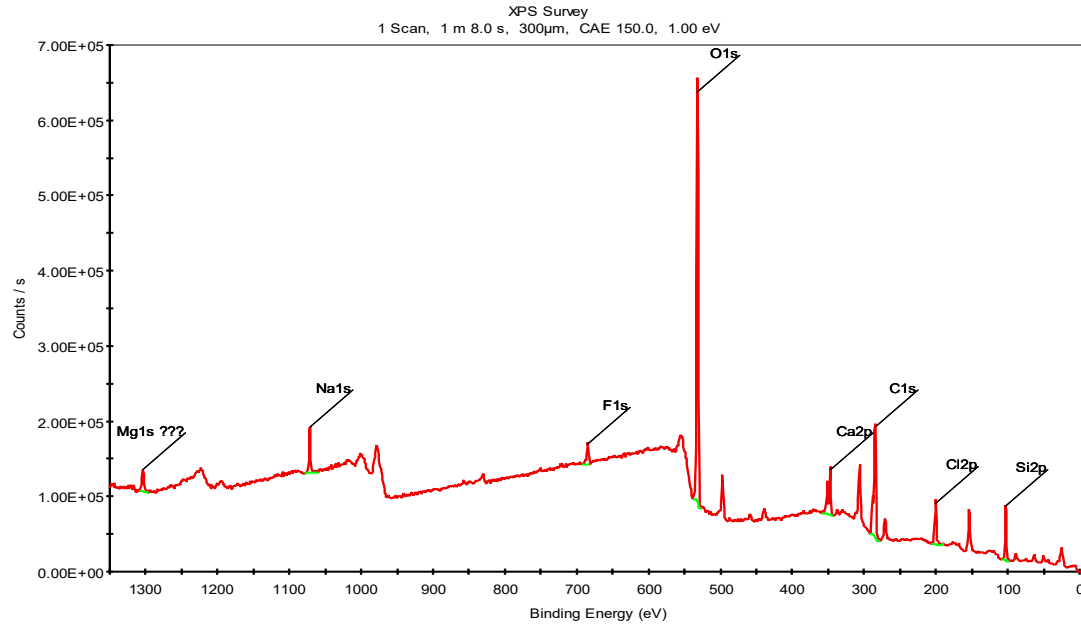

**Fig. S6.** XPS survey spectrum of Au-Ti<sub>2</sub>N-COOH.

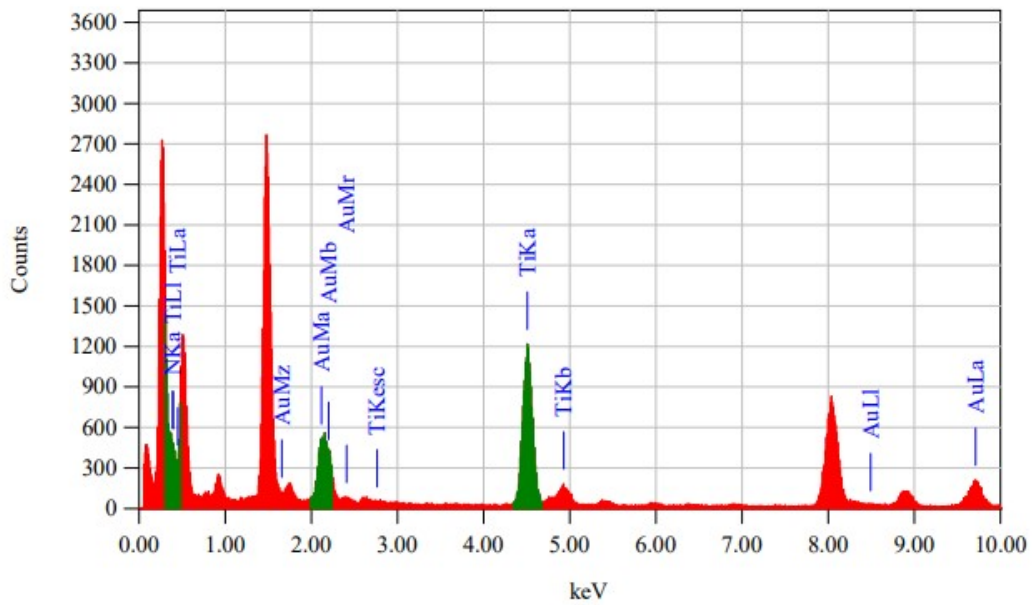

**Fig. S7.** Elemental content of Ti,Au,N.

XRF

Thin Film Standardless Standardless Quantitative Analysis  
Fitting Coefficient : 0.6884

| Element | (keV)    | Mass% | Counts | Sigma    | Atom% | Compound | Mass% | Cation | K      |
|---------|----------|-------|--------|----------|-------|----------|-------|--------|--------|
| N       | K        | 0.392 | 5.17   | 692.20   | 0.30  |          |       |        | 1.8358 |
| Ti      | K (Ref.) | 4.508 | 49.27  | 12105.64 | 0.96  |          |       |        | 1.0000 |
| Au      | M        | 2.120 | 45.55  | 4065.96  | 1.39  |          |       |        | 2.7525 |
| Total   |          |       | 100.00 |          |       |          |       |        | 100.00 |

**Table. S2.** The proportion of Ti,Au and N elements.

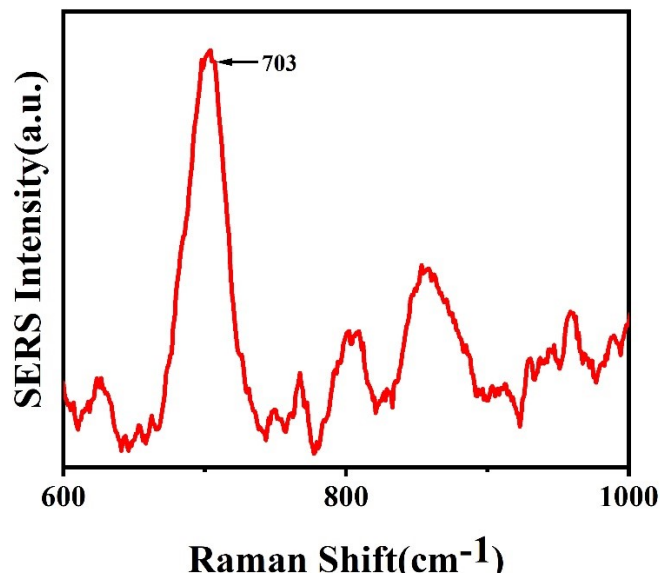

**Fig. S8.** SERS signal plots for Melamine

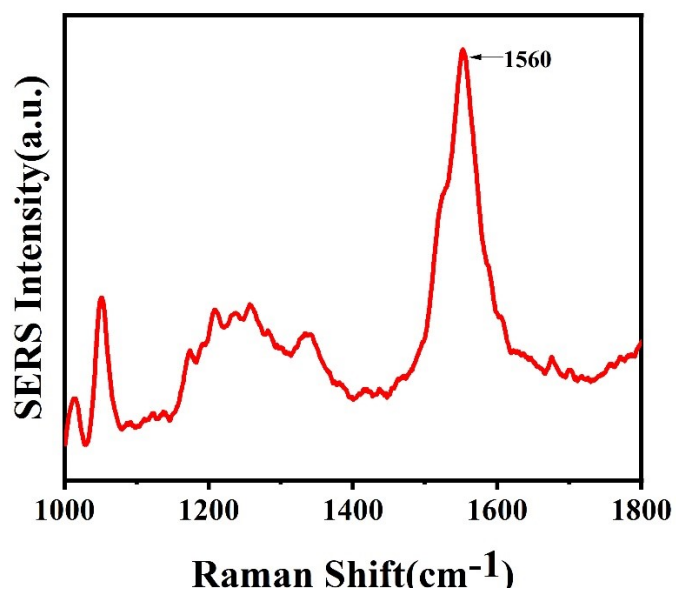

**Fig. S9.** SERS signal plots for 4-MBA

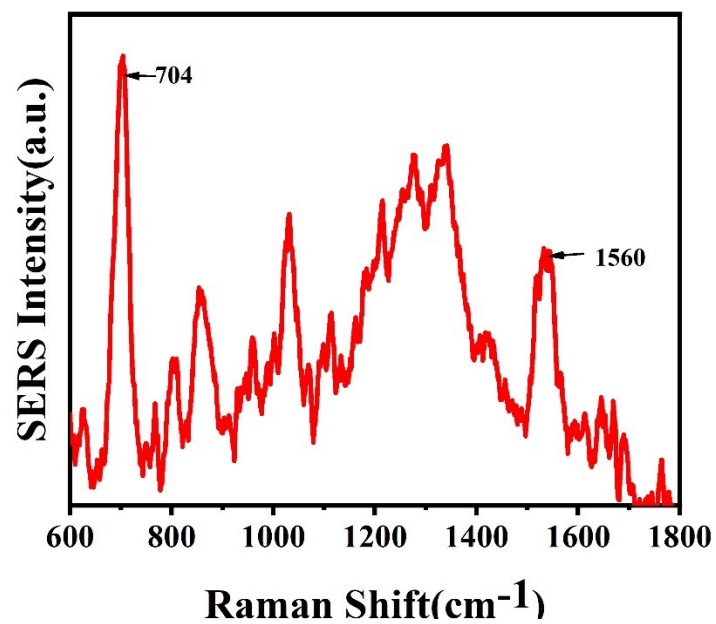

Fig. S10. SERS signal plots for Melamine and 4-MBA

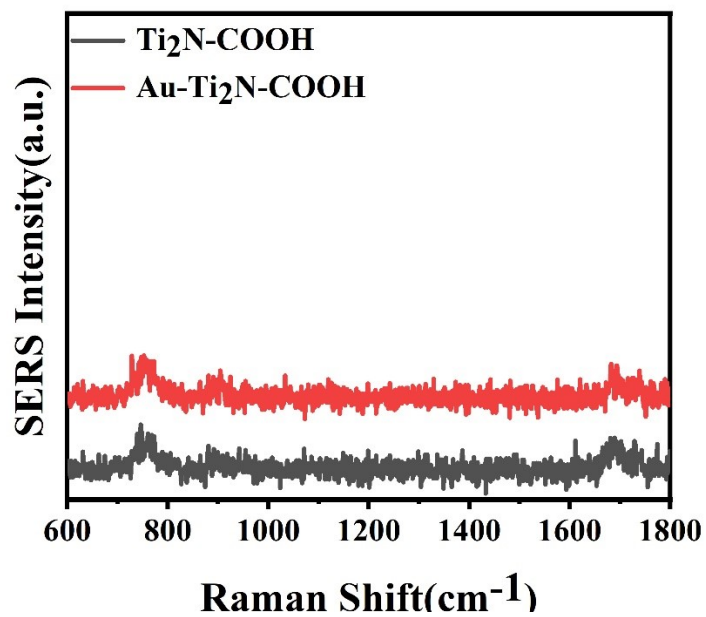

Fig. S11. SERS signal plots for Ti<sub>2</sub>N-COOH and Au-Ti<sub>2</sub>N-COOH

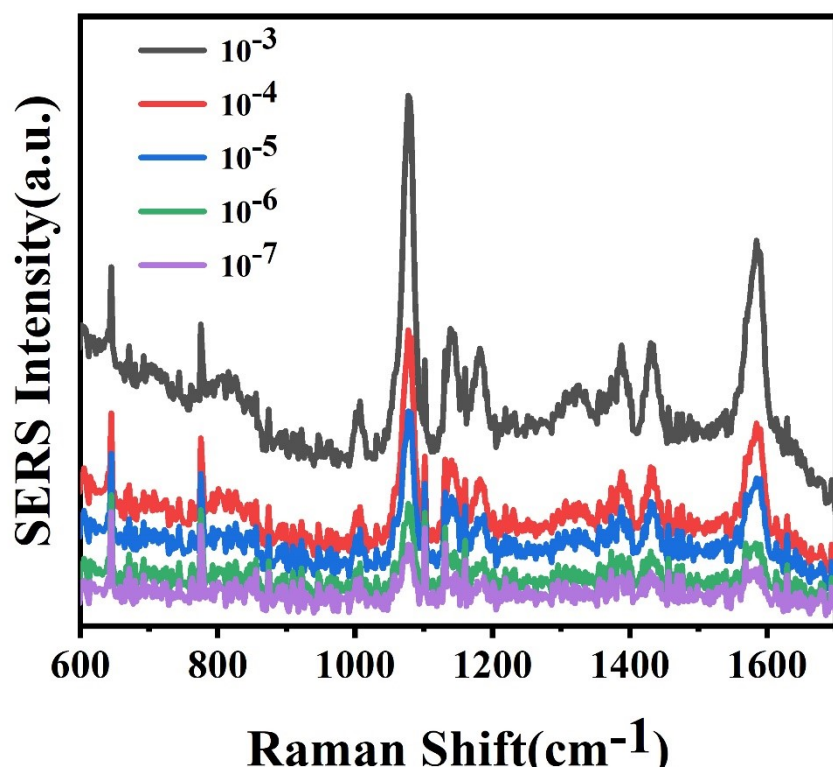

**Fig. S12.** Ti<sub>2</sub>N-COOH material detection 4-MBA SERS signal diagram.
